# Supplementary material for: Sink Strength Promoting Remobilization of Non-Structural Carbohydrates by Activating Sugar Signaling in Rice Stem during Grain Filling
Source: MDPI journal article supplement (doi:10.3390/ijms23094864), 2022-04-27
Supplement: s1 [file s1]

## Supplementary data

**Table S1. Sequences of primers for Actin and genes for qRT-PCR**

| Gene           | Forward primer 5' → 3' | Reverse primer 5' → 3' |
|----------------|------------------------|------------------------|
| <i>Actin</i>   | CAATCGTGAGAAGATGACCC   | GTCCATCAGGAAGCTCGTAGC  |
| <i>OsSUS2</i>  | GAGGCTGATGACCTTGACTGG  | CCCTCCATTACTTGGATGTGCT |
| <i>OsAGPL1</i> | GGAAAGGTTCTATTGGAATCG  | GGAGGGCTTTATTCCACCTCAG |
| <i>α-Amy3</i>  | GATCCCGAACGGTGGAAGG    | GAACCGGGAGGTCTCATGTC   |
| <i>OsTPS8</i>  | TTAATCCTCAGGGTGTGGGC   | CAGGCGAAGGGCTGATCATA   |
| <i>OsTPP1</i>  | GTTGGGCGGCCTGCCTTCAA   | AGCCTCCTGCGAGGTGACGA   |
| <i>OSK1</i>    | AACCAGAGGTAACAGGCAGG   | CATCTGTCAAGGAATGCAGG   |
| <i>OSK24</i>   | GCAGTGATCCTCATGCCAG    | CCTTCGCTGTCTAAGGGACT   |

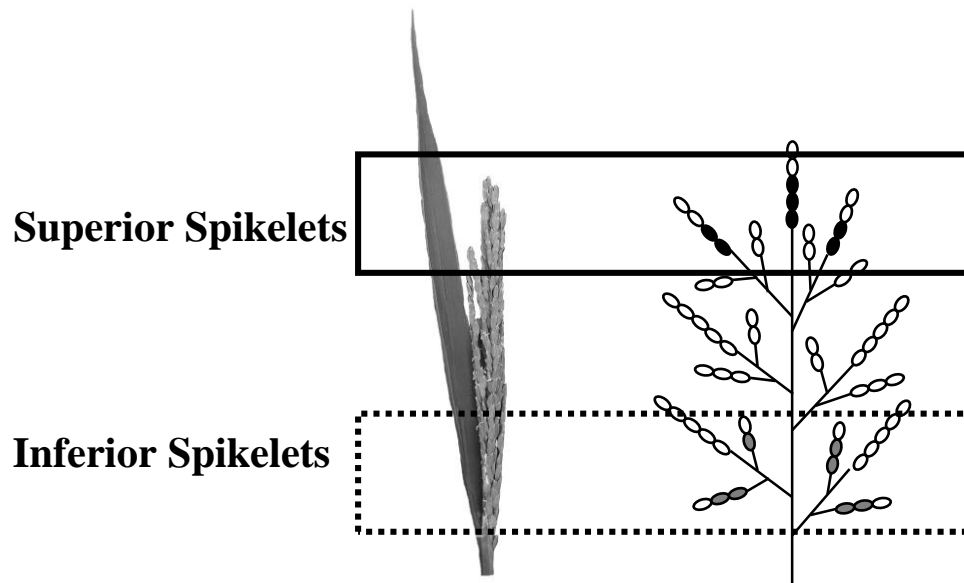

**Supplementary Figure S1.** Schematic diagram of rice panicle structure aookied to study the effect of flowering time gap and competition between superior spikelets and inferior spikelets in rice.
